# Supplementary material for: Bioengineered Nanoparticles Loaded-Hydrogels to Target TNF Alpha in Inflammatory Diseases
Source: MDPI journal article supplement (doi:10.3390/pharmaceutics13081111), 2021-07-21
Supplement: s1 [file s1]

# Supplementary Materials: Bioengineered Nanoparticles Loaded-Hydrogels to Target TNF Alpha in Inflammatory Diseases

Isabel Matos Oliveira, Diogo Castro Fernandes, Fátima Raquel Maia, Raphael Faustino Canadas, Rui Luís Reis and Joaquim Miguel Oliveira

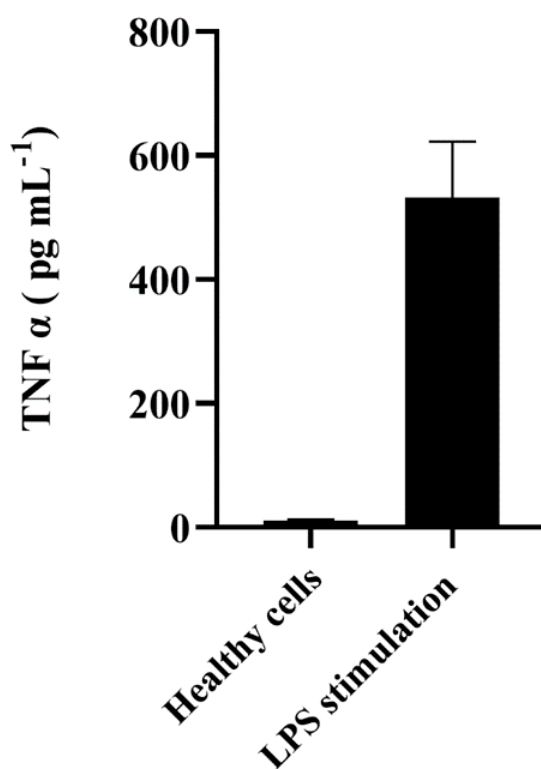

**Figure S1.** Amount of free TNF  $\alpha$  in medium in THP-1 cells culture without LPS stimulation, designated healthy cells, and with LPS stimulation after 1 day, confirming the successful development of THP-1 cells-based inflammation in vitro model.
